# Supplementary material for: Cost-effectiveness of one versus two sample faecal immunochemical testing for colorectal cancer screening
Source: PubMed Central journal article supplement — Gut. 2012 Mar 8;62(5):727–34. doi: 10.1136/gutjnl-2011-301917 (PMC3618685; doi:10.1136/gutjnl-2011-301917), 2012-03-08
Supplement: gutjnl-2011-301917-s1.pdf [file gutjnl-2011-301917-s1.pdf]

# Appendix 1: The MISCAN-Colon microsimulation model

## OUTLINE

|                                            |                |
|--------------------------------------------|----------------|
| <i>Model Overview</i>                      | <i>Page 1</i>  |
| <i>Demography part</i>                     | <i>Page 2</i>  |
| <i>Natural history part</i>                | <i>Page 2</i>  |
| <i>Screening part</i>                      | <i>Page 3</i>  |
| <i>Integration of the three components</i> | <i>Page 3</i>  |
|                                            | <i>Page 5</i>  |
| <i>Model Quantification</i>                | <i>Page 5</i>  |
| <i>Demography parameters</i>               | <i>Page 5</i>  |
| <i>Natural history parameters</i>          | <i>Page 9</i>  |
| <i>Screen parameters</i>                   |                |
|                                            | <i>Page 10</i> |
| <i>Model Output</i>                        |                |
|                                            | <i>Page 11</i> |
| <i>References</i>                          |                |

## MODEL OVERVIEW

The MISCAN-Colon model is a semi-Markov micro-simulation model. The population is simulated individual by individual, and each person can evolve through discrete disease states. However, instead of modeling yearly transitions with associated transition probabilities, the MISCAN-Colon model generates durations in states. This improves model performance. With the assumption of exponential distribution of the duration in each state, this way of simulating leads to the same results as a Markov model with yearly transition probabilities. The advantage of the MISCAN approach is that durations in a certain state need not necessarily be a discrete value but can be continuous. MISCAN uses the Monte Carlo method to simulate all events in the program. Possible events are birth and death of a person, adenoma incidence and transitions from one state of disease to another.

The basic structure of MISCAN-Colon is illustrated in Figure A1.1. Figure A1.1 clearly demonstrates that MISCAN-Colon consists of three parts:

- demography part
- natural history part
- screening part

These parts are not physically separated in the program, but it is useful to consider them separately.

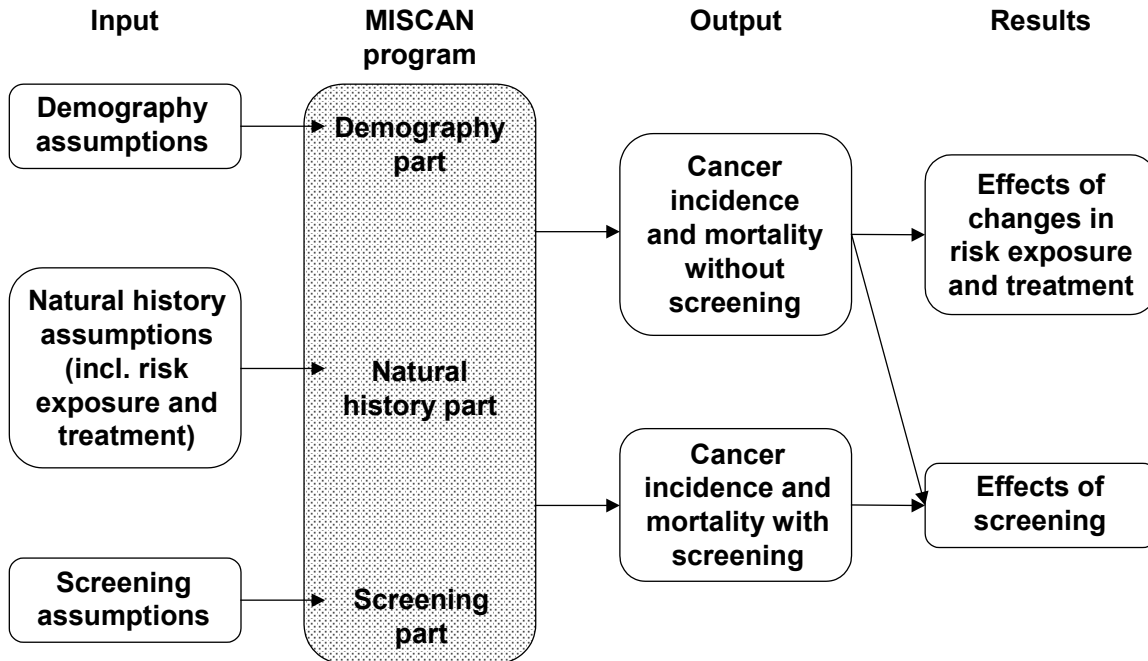

**Figure A1.1:** Structure of MISCAN-Colon

*DEMOGRAPHY PART*

The demography part of the model simulates individual life histories without colorectal cancer to form a population. For each person, a date of birth and a date of death of other causes than colorectal cancer are simulated. The distribution of births and deaths can be adjusted to represent the population simulated. For example, a population of Caucasian females will have higher death ages than a population of African American males.

*NATURAL HISTORY PART*

The Natural History part of MISCAN-Colon simulates the development of colorectal cancer in the population. We assume all colorectal cancers develop according to the adenoma-carcinoma sequence of Morson[1] and Vogelstein[2] (Figure A1.2). For each individual in the simulated population a personal risk index is generated. Subsequently, adenomas are generated in the population according to this personal risk index and an age specific incidence rate of adenomas. This results in no adenomas for most persons and one or more adenomas for others. The distribution of adenomas over the colorectum is simulated according to the observed distribution of colorectal cancer incidence. Each of the adenomas can independently develop into colorectal cancer. Adenomas can progress in size from small (1-5 mm) to medium (6-9 mm) to large (10+ mm). Most adenomas will never develop into cancer (non-progressive adenomas), but some (progressive adenomas) may eventually become malignant, transforming to a stage I cancer. The cancer may then progress from stage I to stage IV. In every stage there is a chance of the cancer being diagnosed because of symptoms. The survival after clinical diagnosis depends on the stage of the cancer.

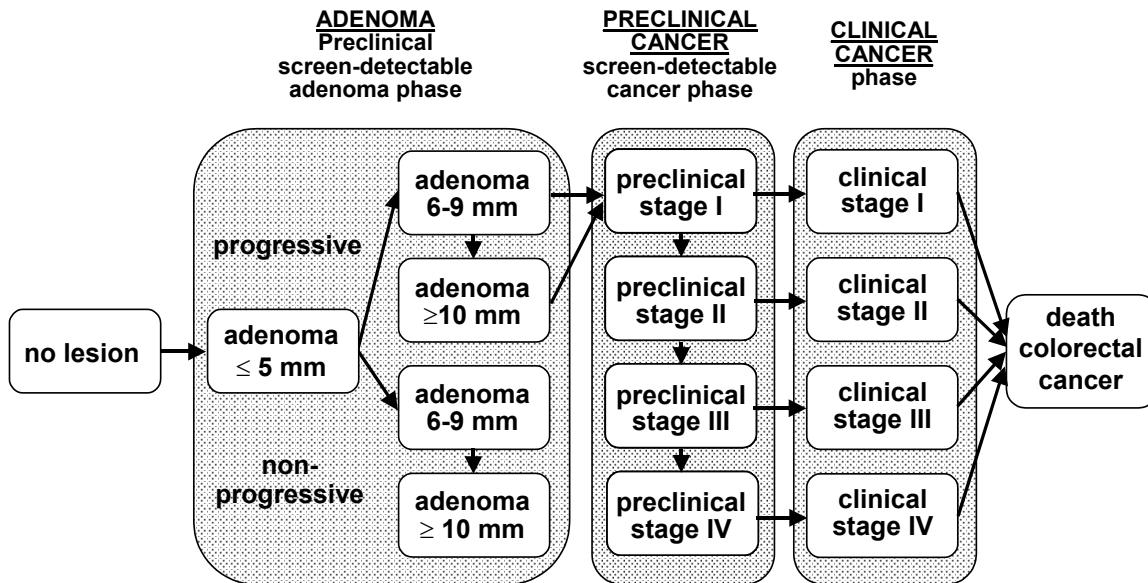

**Figure A1.2:** Adenoma and cancer stages in the MISCAN-Colon model. Cancer stages correspond to the American Joint Committee on Cancer / International Union Against Cancer staging system for colorectal cancer. Adenomas are categorized by size. The size-specific prevalence of adenomas as well as the proportion of adenomas that ever develop into cancer is dependent on age.

#### SCREENING PART

Screening interrupts the development of CRC. With screening, adenomas may be detected and removed and cancers may be found, usually in an earlier stage than with clinical diagnosis. In this way screening prevents CRC incidence or CRC death. The life-years gained by screening are calculated by comparing the model-predicted life-years lived in the population with and without screening. The effects of different screening policies can be compared by applying them to identical natural histories.

#### INTEGRATION OF THE THREE MODEL COMPONENTS

For each individual, the demography part of the model simulates a time of birth and a time of death of other causes than colorectal cancer, creating a life history without colorectal cancer (top line in Figure A1.3a). Subsequently adenomas are simulated for that individual. For most individuals no adenomas are generated, for other multiple. In the example in Figure A1.3, the person gets two adenomas (2<sup>nd</sup> and 3<sup>rd</sup> line in Figure A1.3a). The first adenoma arises at a certain age, grows into 6-9 mm and eventually becomes larger than 10 mm. However, this adenoma does not become cancer before the death of the person. The second adenoma is a progressive adenoma. After having grown to 6-9 mm, the adenoma transforms into a malignant carcinoma, causing symptoms and diagnosis and eventually resulting in an earlier death from CRC. The life history without CRC and the development of the two adenomas in Figure A1.3 together lead to the combined life history with CRC depicted in the bottom line. Because this person dies from colorectal cancer before he dies from other causes, his death age is adjusted accordingly.

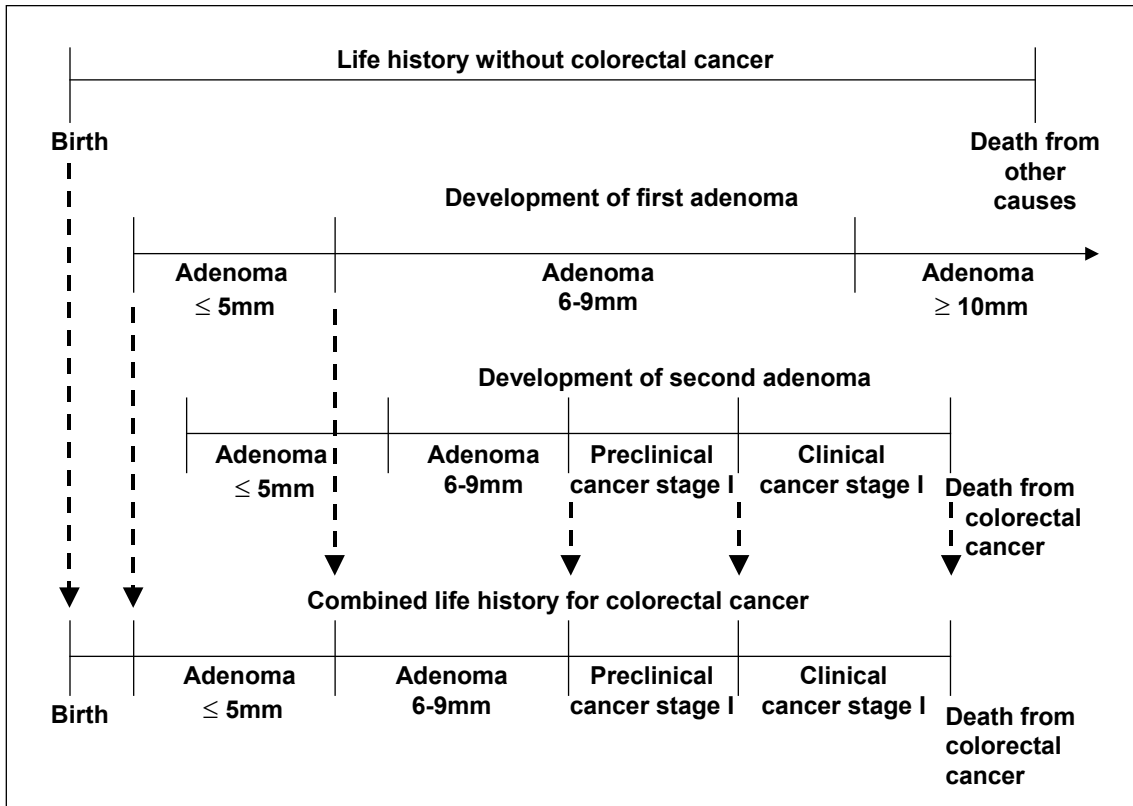

**Figure A1.3a:** Modeling natural history into life history

After the life history of a person is adjusted for colorectal cancer, the history will now be adjusted for the effects of screening. The effect of screening on life history is explained in Figure A1.3b. The top line in this figure is the combined life history for colorectal cancer from Figure A1.3a. The development of the separate adenomas is repeated in the second and third line. In this picture there is one screening intervention. During the screening both prevalent adenomas are detected and removed. This results in a combined life history for colorectal cancer and screening (bottom line). From the moment of screening the adenomas are removed and this individual becomes adenoma and carcinoma free. He does not develop cancer because the precursor lesion has been removed. Therefore the person dies at the moment of death from other causes and the effect of screening is the difference in life-years in the situation without screening and the situation with screening. Of course many other possibilities could have occurred: a person could have developed new adenomas after the screening moment, or an adenoma could have been missed by the screening test, but in this case this individual really benefited from the screening intervention.

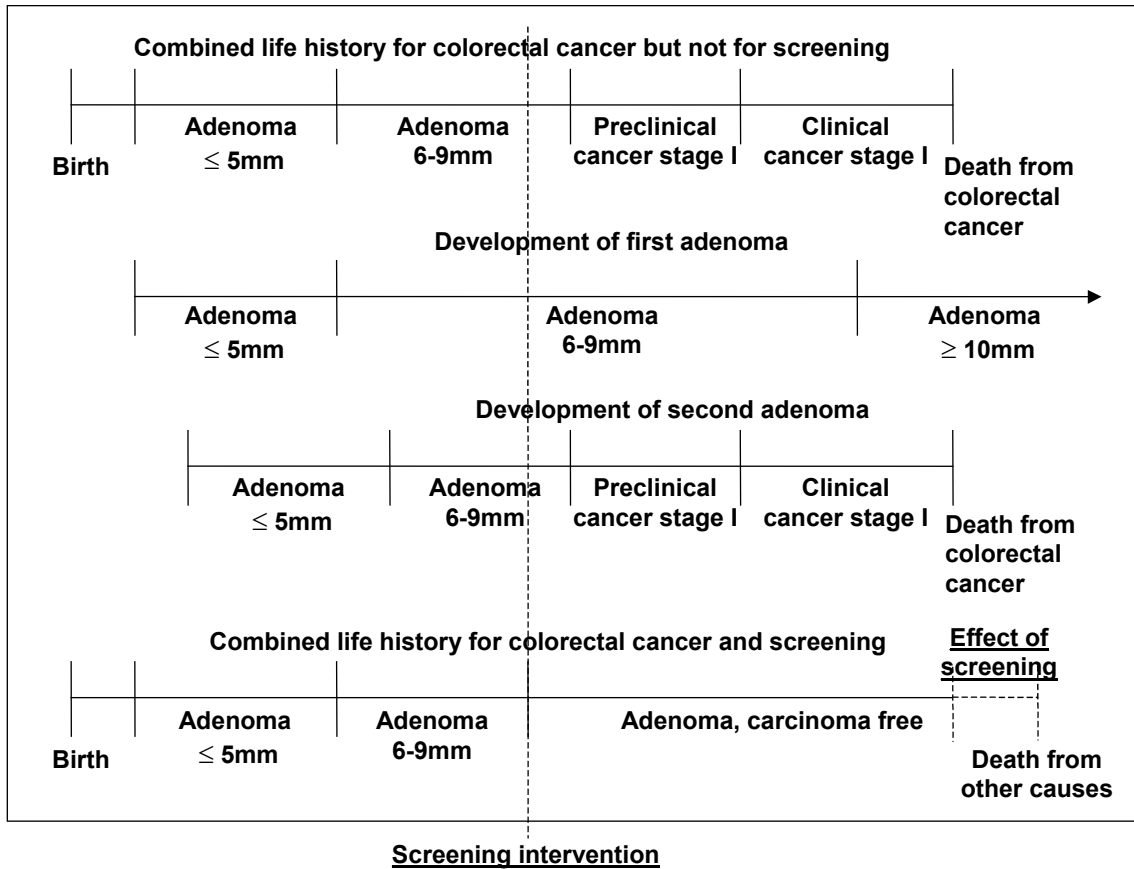

**Figure A1.3b:** Modeling screening into life history

### MODEL QUANTIFICATION

For this analysis we simulated the Dutch population in 2005.

#### DEMOGRAPHY PARAMETERS

There are two types of demography parameters: birth tables and life tables. Birth tables were constructed such that the age distribution of the Dutch population in 2005 was simulated. Age distribution and life tables were derived from Statistics Netherlands ([www.cbs.nl](http://www.cbs.nl)). These life tables include colorectal cancer mortality and the demography part simulates mortality from other causes than colorectal cancer. Therefore, mortality from colorectal cancer was derived from Comprehensive Cancer Centres (CCC, [www.ikcnet.nl](http://www.ikcnet.nl)), and excluded from the life tables.

#### NATURAL HISTORY PARAMETERS

The parameters for natural history model that could not be directly estimated from data or fit to reference data, were established based on expert opinion. At two expert meetings at the NCI on June 5–7, 1996, and May 12–13, 1997, a model structure was devised in agreement with the currently accepted model of the adenoma–carcinoma sequence. It was assumed that all cancers are preceded by adenomas.

The average duration between onset of a progressive adenoma and the transition to preclinical cancer was assumed 20 years based on expert opinion. The duration of

cancer in preclinical stages was estimated based on the results of three large randomized controlled screening trials [3]. This resulted in an average duration of 2.5 years, 2.5 year, 3.7 years, and 1.5 year, for stages I-IV respectively, with a total average duration of 6.7 years because not every cancer reaches stage IV before clinical diagnosis. All durations were governed by an exponential probability distribution. Durations in each of the invasive cancer stages as well as durations in the stages of the noninvasive adenomas were assumed to be 100% associated with each other, but the durations in invasive stages as a whole were independent of durations in noninvasive adenoma stages that precede cancer. These assumptions resulted in an exponential distribution of the total duration of progressive noninvasive adenomas and of the total duration of preclinical cancer, which has also been used in other cancer screening models [4, 5].

It was assumed that 30% of the cancers arise from adenomas of 6–9 mm and that 70% arise from larger adenomas. Initially, the preclinical incidence of progressive adenomas was chosen to reproduce the colorectal cancer incidence by age, stage, and localization in the Netherlands in 1999-2003 (CCC). The size distribution of adenomas over all ages was assumed to be 56% for stages less than or equal to 5 mm, 24% for stages 6–9 mm, and 20% for stages greater than or equal to 10 mm [6-15]. The preclinical incidence of non-progressive adenomas that will never grow into cancer was varied until the simulated prevalence of all adenomas was in agreement with data from autopsy studies [6-15].

The anatomic site distribution of both progressive and non-progressive adenomas and thus of preclinical and clinical cancers is assumed to be equal to the site distribution of colorectal cancers in the Netherlands in 1999-2003 (CCC). The stage-specific survival after the clinical diagnosis of colorectal cancer before age 75 is taken from the Comprehensive Cancer Centre South from 1989 through 2003, because national data were not available (CCCS, V. Lemmens 2010). The stage-specific survival after age 75 was fitted on the CRC mortality derived from the Comprehensive Cancer Centre from 1999-2003 (CCC). Table A1.1 contains a summary of the model input values and its data-sources.

**Table A1.1:** Main natural history assumptions in the MISCAN-Colon model

| Model parameter                                                            | Value                                                                                                                                                                                                                                                                                                                                                                                                                                                                                | Source                                                                                                                                                                                                                                                                                                                                                                                                                                                                                                                                                |
|----------------------------------------------------------------------------|--------------------------------------------------------------------------------------------------------------------------------------------------------------------------------------------------------------------------------------------------------------------------------------------------------------------------------------------------------------------------------------------------------------------------------------------------------------------------------------|-------------------------------------------------------------------------------------------------------------------------------------------------------------------------------------------------------------------------------------------------------------------------------------------------------------------------------------------------------------------------------------------------------------------------------------------------------------------------------------------------------------------------------------------------------|
| Distribution of risk for adenomas over the general population              | Gamma distributed, mean 1, variance 2.1                                                                                                                                                                                                                                                                                                                                                                                                                                              | Fit to multiplicity distribution of adenomas in autopsy studies [6-13, 15]                                                                                                                                                                                                                                                                                                                                                                                                                                                                            |
| Adenoma incidence in general population                                    | Age dependent:<br><br>0-19 years: 0.2% per year<br>20-24 years: 0.4% per year<br>25-29 years: 0.4% per year<br>30-34 years: 0.6% per year<br>35-39 years: 0.6% per year<br>40-44 years: 2.4% per year<br>45-49 years: 2.9% per year<br>50-54 years: 3.0% per year<br>55-59 years: 3.4% per year<br>60-64 years: 4.1% per year<br>65-69 years: 4.7% per year<br>70-74 years: 5.7% per year<br>75-79 years: 3.8% per year<br>80-84 years: 3.6% per year<br>85-100 years: 1.0% per year | Fit to adenoma prevalence in autopsy studies [6-15] and to cancer incidence in 1999-2003 per 100,000 (CCC)<br><br><20 years            0.2<br>20-24 years         0.5<br>25-29 years         1.3<br>30-34 years         2.6<br>35-39 years         5.6<br>40-44 years         11.0<br>45-49 years         23.9<br>50-54 years         50.7<br>55-59 years         85.4<br>60-64 years         142.3<br>65-69 years         201.4<br>70-74 years         275.5<br>75-79 years         347.7<br>80-84 years         389.3<br>85+ years            332.4 |
| Probability that a new adenoma is progressive                              | Dependent on age at onset:<br>0-45 years: linearly increasing from 0 to 5%<br>45-65 years: linearly increasing from 5% to 15%<br>65-100 years: linearly increasing from 15% to 23%                                                                                                                                                                                                                                                                                                   | Fit to adenoma prevalence in autopsy studies, [6-15] cancer incidence in 1999-2003 (CCC).                                                                                                                                                                                                                                                                                                                                                                                                                                                             |
| Regression of adenomas                                                     | No significant regression of adenomas                                                                                                                                                                                                                                                                                                                                                                                                                                                | Expert opinion                                                                                                                                                                                                                                                                                                                                                                                                                                                                                                                                        |
| Mean duration of development of progressive adenomas to preclinical cancer | 20 years                                                                                                                                                                                                                                                                                                                                                                                                                                                                             | Expert opinion*                                                                                                                                                                                                                                                                                                                                                                                                                                                                                                                                       |
| Mean duration of preclinical cancer                                        | 6.7 years                                                                                                                                                                                                                                                                                                                                                                                                                                                                            | Estimated from FOBT trials [3].                                                                                                                                                                                                                                                                                                                                                                                                                                                                                                                       |
| Percent of non-progressive adenomas that stay 6-9mm                        | 50%                                                                                                                                                                                                                                                                                                                                                                                                                                                                                  | Fit to size distribution of adenomas in autopsy studies: [6-15]<br><br>1-5mm:                56%<br>6-9 mm:              24%<br>10+ mm:              20%                                                                                                                                                                                                                                                                                                                                                                                              |

| Model parameter                                                            | Value                                                   | Source                                                                                                              |
|----------------------------------------------------------------------------|---------------------------------------------------------|---------------------------------------------------------------------------------------------------------------------|
| Percent of non-progressive adenoma that become 10mm or larger              | 50%                                                     | Fit to size distribution of adenomas in autopsy studies: [6-15]<br>1-5mm: 56%<br>6-9 mm: 24%<br>10+ mm: 20%         |
| Percent of cancers that develops from 6-9mm adenoma and from 10+mm adenoma | 30% of cancer develops from 6-9 mm, 70% from 10+mm      | Expert opinion                                                                                                      |
| Localization distribution of adenomas and cancer                           | Rectum: 26%<br>Distal colon: 42%<br>Proximal colon: 32% | Directly estimated from CCC 1999-2003.                                                                              |
| 10-year survival after clinical diagnosis of CRC                           | Dependent on age, stage and localization                | Directly estimated from CCC South 1989-2003 for diagnosis before age 75 and fitted on mortality from CCC 1999-2003. |

\* To be estimated from randomized controlled endoscopy trials, data not yet available.



### SCREEN PARAMETERS

We assumed a cecal intubation rate of 95% [16-18]. The sensitivity of colonoscopy for each lesion within realized reach was based on back-to-back colonoscopy studies: 75% in adenomas less than or equal to 5 mm, 85% in adenomas 6–9 mm, and 95% in adenomas greater than or equal to 10 mm and cancers (table A1.2)[19]. After a positive test, all lesions are removed within a short time. The percentage of the population without adenomas or cancer but with hyperplastic polyps, lipomas, or other lesions that lead to polypectomy and pathology after colonoscopy has been estimated from Kaiser data:[20] 10%. This percentage was assumed to be independent of the screening round.

The stage-specific survival of patients with screen-detected cancer was based on a previous analysis calibrating on three large randomized FOBT-trials[3], and was more favorable than the survival after diagnosis in the same stage without screen-detecting. Removal of an adenoma always prevents development of any subsequent cancer that may have arisen from this adenoma. Risks of complications reported in organized screening programs [21-23] are lower than those reported for general practice colonoscopies [24, 25]. The major complications of colonoscopy are perforations (which can occur with or without polypectomy), serosal burns, bleeds requiring transfusion and bleeds not requiring transfusion [21-25]. We estimated a rate of death of 0.1 per 1,000 colonoscopies [26, 27].

**Table A1.2:** Colonoscopy characteristics

| Parameter                                          | Value                                                                                                                       | Source                                                            |
|----------------------------------------------------|-----------------------------------------------------------------------------------------------------------------------------|-------------------------------------------------------------------|
| Sensitivity colonoscopy                            | Dependent on stage of disease<br>Adenoma 1-5mm: 75%<br>Adenoma 6-9mm: 85%<br>Adenoma 10+ mm: 95%<br>Preclinical cancer: 95% | Back-to-back colonoscopy studies [19]                             |
| Cecal intubation rate                              | 95%                                                                                                                         | General practice [16, 17] and guidelines [18]                     |
| Complication rate with colonoscopy                 | 2.4 per 1,000 colonoscopies                                                                                                 | Organized screening programs[21-23] and general practice [24, 25] |
| Perforation                                        | 0.7 per 1,000                                                                                                               |                                                                   |
| Serosal burn                                       | 0.3 per 1,000                                                                                                               |                                                                   |
| Bleed with transfusion                             | 0.4 per 1,000                                                                                                               |                                                                   |
| Bleed without transfusion                          | 1.1 per 1,000                                                                                                               |                                                                   |
| Fatal complication rate with colonoscopy           | 0.1 per 1,000 colonoscopies                                                                                                 | Prospective endoscopy study [28]                                  |
| Probability to develop cancer from removed adenoma | 0%                                                                                                                          | Expert opinion                                                    |
| Survival after screen detection of cancer          | Same as after clinical diagnosis in the next stage                                                                          | FOBT trial [3]                                                    |



## **MODEL OUTPUTS**

The model generates the following output, both undiscounted and discounted:

### *Demography*

1. Life-years lived in the population by calendar year and age
2. Deaths from other causes than colorectal cancer by calendar year and age

### *Natural history*

1. Colorectal cancer cases by calendar year, stage and age
2. Colorectal cancer deaths by calendar year and age
3. Life-years lived with colorectal cancer by calendar year, stage and age
4. Total number of life years with surveillance for adenoma patients
5. Total number of life years with initial therapy after screen-detected or clinical invasive cancer by stage
6. Total number of life years with continuing therapy after screen-detected or clinical invasive cancer by stage
7. Total number of life years with terminal care before death from other causes by stage
8. Total number of life years with terminal care before death from colorectal cancer by stage

### *Screening*

1. Number of invitations for screen-tests, screen-tests, diagnostic tests, surveillance and opportunistic screen tests by calendar year
2. Number of positive and negative test results per preclinical state and per year
3. Total number of life years lived, life years lost due to cancer, number of specific deaths and non specific deaths
4. Number of screenings that prevented cancer by year of screening
5. Number of screenings that detected cancer early by year of screening
6. Number of surveillance tests that prevented cancer by year of surveillance
7. Number of surveillance tests that detected cancer early by year of surveillance
8. Number of life years gained due to screening by year of screening

## REFERENCES

- 1 Morson B. President's address. The polyp-cancer sequence in the large bowel. *Proc R Soc Med* 1974;67:451-7.
- 2 Vogelstein B, Fearon ER, Hamilton SR, et al. Genetic alterations during colorectal-tumor development. *N Engl J Med* 1988;319:525-32.
- 3 Lansdorp-Vogelaar I, van Ballegooijen M, Boer R, et al. A novel hypothesis on the sensitivity of the fecal occult blood test: Results of a joint analysis of 3 randomized controlled trials. *Cancer* 2009;115:2410-9.
- 4 Gyrd-Hansen D, Sogaard J, Kronborg O. Analysis of screening data: colorectal cancer. *Int J Epidemiol* 1997;26:1172-81.
- 5 Launoy G, Smith TC, Duffy SW, et al. Colorectal cancer mass-screening: estimation of faecal occult blood test sensitivity, taking into account cancer mean sojourn time. *Int J Cancer* 1997;73:220-4.
- 6 Arminski TC, McLean DW. Incidence and Distribution of Adenomatous Polyps of the Colon and Rectum Based on 1,000 Autopsy Examinations. *Dis Colon Rectum* 1964;7:249-61.
- 7 Blatt L. Polyps of the Colon and Rectum: Incidence and Distribution. *Dis Colon Rectum* 1961;4:277-82.
- 8 Bombi JA. Polyps of the colon in Barcelona, Spain. An autopsy study. *Cancer* 1988;61:1472-6.
- 9 Chapman I. Adenomatous polypi of large intestine: incidence and distribution. *Ann Surg* 1963;157:223-6.
- 10 Clark JC, Collan Y, Eide TJ, et al. Prevalence of polyps in an autopsy series from areas with varying incidence of large-bowel cancer. *Int J Cancer* 1985;36:179-86.
- 11 Jass JR, Young PJ, Robinson EM. Predictors of presence, multiplicity, size and dysplasia of colorectal adenomas. A necropsy study in New Zealand. *Gut* 1992;33:1508-14.
- 12 Johannsen LG, Momsen O, Jacobsen NO. Polyps of the large intestine in Aarhus, Denmark. An autopsy study. *Scand J Gastroenterol* 1989;24:799-806.
- 13 Rickert RR, Auerbach O, Garfinkel L, et al. Adenomatous lesions of the large bowel: an autopsy survey. *Cancer* 1979;43:1847-57.
- 14 Vatn MH, Stalsberg H. The prevalence of polyps of the large intestine in Oslo: an autopsy study. *Cancer* 1982;49:819-25.
- 15 Williams AR, Balasooriya BA, Day DW. Polyps and cancer of the large bowel: a necropsy study in Liverpool. *Gut* 1982;23:835-42.
- 16 Aslinia F, Uradomo L, Steele A, et al. Quality assessment of colonoscopic cecal intubation: an analysis of 6 years of continuous practice at a university hospital. *Am J Gastroenterol* 2006;101:721-31.
- 17 Cotterill M, Gasparelli R, Kirby E. Colorectal cancer detection in a rural community. Development of a colonoscopy screening program. *Can Fam Physician* 2005;51:1224-8.
- 18 Rex DK, Bond JH, Winawer S, et al. Quality in the technical performance of colonoscopy and the continuous quality improvement process for colonoscopy: recommendations of the U.S. Multi-Society Task Force on Colorectal Cancer. *Am J Gastroenterol* 2002;97:1296-308.
- 19 van Rijn JC, Reitsma JB, Stoker J, et al. Polyp miss rate determined by tandem colonoscopy: a systematic review. *Am J Gastroenterol* 2006;101:343-50.
- 20 Levin TR, Palitz A, Grossman S, et al. Predicting advanced proximal colonic neoplasia with screening sigmoidoscopy. *Jama* 1999;281:1611-7.

- 21 Lieberman DA, Weiss DG, Bond JH, et al. Use of colonoscopy to screen asymptomatic adults for colorectal cancer. Veterans Affairs Cooperative Study Group 380. *N Engl J Med* 2000;343:162-8.
- 22 Pox C, Schmiegel W, Classen M. Current status of screening colonoscopy in Europe and in the United States. *Endoscopy* 2007;39:168-73.
- 23 Regula J, Rupinski M, Kraszewska E, et al. Colonoscopy in colorectal-cancer screening for detection of advanced neoplasia. *N Engl J Med* 2006;355:1863-72.
- 24 Levin TR, Conell C, Shapiro JA, et al. Complications of screening flexible sigmoidoscopy. *Gastroenterology* 2002;123:1786-92.
- 25 Levin TR, Zhao W, Conell C, et al. Complications of colonoscopy in an integrated health care delivery system. *Ann Intern Med* 2006;145:880-6.
- 26 Lieberman D. Mass Screening: North American Perspective. In: Young G, Rozen P, Levin B, ed. *Prevention and Early Detection of Colorectal Cancer*. London: W.B. Saunders Company Ltd 1996.
- 27 Neugut A, Young GP. Screening for colorectal cancer: an overview. In: Young G, Rozen P, Levin B, ed. *Prevention and early detection of colorectal cancer*. London (U.K.): Saunders 1996:357-67.
- 28 Jentschura D, Raute M, Winter J, et al. Complications in endoscopy of the lower gastrointestinal tract. Therapy and prognosis. *Surg Endosc* 1994;8:672-6.
