# Supplementary material for: Cost-effectiveness of one versus two sample faecal immunochemical testing for colorectal cancer screening
Source: PubMed Central journal article supplement — Gut. 2012 Mar 8;62(5):727–34. doi: 10.1136/gutjnl-2011-301917 (PMC3618685; doi:10.1136/gutjnl-2011-301917), 2012-03-08
Supplement: gutjnl-2011-301917-s2.pdf [file gutjnl-2011-301917-s2.pdf]

**Appendix 2** – Summary results of biennial 1- and 2-sample FIT screening strategies with the age range of 55-75 years.

| Screen test and cut-off level* | Incidence reduction (0% discount) | Mortality reduction (0% discount) | Life years gained (3% discount) | Costs per 1,000 individuals (x1,000 €) (3% discount) |     |                                           |                          |                                 |                                 |                  |
|--------------------------------|-----------------------------------|-----------------------------------|---------------------------------|------------------------------------------------------|-----|-------------------------------------------|--------------------------|---------------------------------|---------------------------------|------------------|
|                                |                                   |                                   |                                 | Total                                                | FIT | Diagnostic colonoscopy after positive FIT | Surveillance colonoscopy | Clinical diagnostic colonoscopy | Complications after colonoscopy | Treatment of CRC |
| <i>1sFIT</i>                   |                                   |                                   |                                 |                                                      |     |                                           |                          |                                 |                                 |                  |
| 50                             | 12.83%                            | 28.34%                            | 97.0                            | 261                                                  | 186 | 143                                       | 71                       | -10.4                           | 1.7                             | -130             |
| 75                             | 10.39%                            | 25.98%                            | 89.2                            | 262                                                  | 191 | 114                                       | 58                       | -9.8                            | 1.4                             | -93              |
| 100                            | 9.08%                             | 24.22%                            | 83.1                            | 259                                                  | 193 | 98                                        | 51                       | -9.3                            | 1.2                             | -74              |
| 150                            | 7.74%                             | 22.92%                            | 79.3                            | 260                                                  | 196 | 83                                        | 45                       | -9.0                            | 1.0                             | -55              |
| 200                            | 6.47%                             | 21.94%                            | 76.0                            | 264                                                  | 197 | 72                                        | 39                       | -8.7                            | 0.9                             | -36              |
| <i>2sFIT (both)</i>            |                                   |                                   |                                 |                                                      |     |                                           |                          |                                 |                                 |                  |
| 50                             | 8.58%                             | 21.38%                            | 71.8                            | 293                                                  | 244 | 83                                        | 46                       | -8.3                            | 1.0                             | -73              |
| 75                             | 6.47%                             | 18.60%                            | 63.0                            | 298                                                  | 248 | 64                                        | 36                       | -7.4                            | 0.8                             | -43              |
| 100                            | 5.29%                             | 16.39%                            | 55.2                            | 296                                                  | 250 | 53                                        | 30                       | -6.6                            | 0.6                             | -30              |
| 150                            | 3.90%                             | 13.92%                            | 47.4                            | 298                                                  | 252 | 41                                        | 23                       | -5.8                            | 0.5                             | -13              |
| 200                            | 2.88%                             | 11.71%                            | 40.3                            | 298                                                  | 253 | 34                                        | 18                       | -5.1                            | 0.4                             | -2               |
| <i>2sFIT (mean)</i>            |                                   |                                   |                                 |                                                      |     |                                           |                          |                                 |                                 |                  |
| 50                             | 13.95%                            | 29.27%                            | 99.5                            | 304                                                  | 230 | 153                                       | 77                       | -10.7                           | 1.9                             | -147             |
| 75                             | 11.35%                            | 26.81%                            | 91.7                            | 305                                                  | 237 | 121                                       | 63                       | -10.0                           | 1.5                             | -107             |
| 100                            | 9.78%                             | 24.92%                            | 85.7                            | 305                                                  | 240 | 103                                       | 55                       | -9.5                            | 1.2                             | -85              |
| 150                            | 8.11%                             | 23.36%                            | 80.7                            | 306                                                  | 244 | 86                                        | 46                       | -9.1                            | 1.0                             | -62              |
| 200                            | 6.48%                             | 21.78%                            | 75.7                            | 314                                                  | 246 | 73                                        | 39                       | -8.6                            | 0.9                             | -36              |
| <i>2sFIT (≥1)</i>              |                                   |                                   |                                 |                                                      |     |                                           |                          |                                 |                                 |                  |
| 50                             | 15.25%                            | 30.62%                            | 104.4                           | 320                                                  | 223 | 188                                       | 85                       | -11.0                           | 2.2                             | -166             |
| 75                             | 12.69%                            | 28.65%                            | 97.8                            | 318                                                  | 230 | 153                                       | 71                       | -10.6                           | 1.8                             | -127             |
| 100                            | 11.29%                            | 27.29%                            | 93.6                            | 316                                                  | 234 | 132                                       | 64                       | -10.2                           | 1.6                             | -105             |
| 150                            | 10.00%                            | 26.36%                            | 91.0                            | 314                                                  | 238 | 113                                       | 57                       | -9.9                            | 1.4                             | -87              |
| 200                            | 8.93%                             | 25.59%                            | 88.4                            | 314                                                  | 241 | 100                                       | 52                       | -9.8                            | 1.2                             | -70              |

\* 1sFIT = 1-sample FIT; 2sFIT(both) = 2-sample FIT, both samples positive; 2sFIT(mean) = 2-sample FIT, mean of both samples positive; 2sFIT(≥1) = 2-sample FIT, at least one sample positive.
